1 Antimalarial drug mefloquine kills both trophozoite and cyst stages of *Entamoeba*

2

3 Mefloquine and *Entamoeba histolytica*

4

5

6 Conall Sauvey<sup>1</sup>, Gretchen Ehrenkauf<sup>2</sup>, Anjan Debnath<sup>1</sup>, Ruben Abagyan<sup>1\*</sup>

7

8 <sup>1</sup>Center for Discovery and Innovation in Parasitic Diseases, Skaggs School for Pharmacy and  
9 Pharmaceutical Sciences, University of California - San Diego, La Jolla, California, USA

10 <sup>2</sup>Division of Infectious Diseases, Department of Internal Medicine, Stanford University School of  
11 Medicine, Stanford, California, USA

12

13

14 \* Corresponding author

15 Email: [ruben@ucsd.edu](mailto:ruben@ucsd.edu)

16

17

18

19

20

21

22

23

24

25

## 26 **Abstract**

27 *Entamoeba histolytica* is a protozoan parasite which infects approximately 50 million  
28 people worldwide, resulting in an estimated 70,000 deaths every year. Since the 1960s *E.*  
29 *histolytica* infection has been successfully treated with metronidazole. However, drawbacks to  
30 metronidazole therapy exist, including adverse effects, length of treatment, and the need for  
31 additional drugs to prevent transmission. All of these may decrease patient compliance and  
32 hence increase disease severity and spread of infection. In this study we identified the  
33 antimalarial drug mefloquine as possessing more potent, rapid, amoebicidal *in vitro* activity  
34 against *E. histolytica* trophozoites than metronidazole. We also showed that mefloquine could  
35 kill the cysts of a closely related reptilian parasite *Entamoeba invadens* unlike metronidazole.  
36 Additionally, mefloquine is known to possess a much longer half-life in human patients than  
37 metronidazole. This property, along with mefloquine's rapid and broad action against *E.*  
38 *histolytica* position it as a promising new drug candidate against this widespread and  
39 devastating disease.

40

## 41 **Author Summary**

42 Every year, around 70,000 people worldwide die from infection by the intestinal parasite  
43 *Entamoeba histolytica*, despite the widespread availability of the drug metronidazole as a  
44 treatment. Part of the reason for this may be due to issues with patients failing to comply with  
45 the full course of treatment for the drug, due either to unpleasant side-effects, to the somewhat  
46 long treatment period, or the need for a secondary drug to kill the transmissible life stage of the  
47 parasite. In this report we discovered that the antimalarial drug mefloquine killed *E. histolytica*  
48 more potently and more rapidly than metronidazole, and, importantly, also killed the  
49 transmissible cyst stage of another *Entamoeba* species used as a model system. These  
50 findings make mefloquine an excellent candidate for an alternative drug to the current standard,

51 with a simpler course of treatment and a more effective strategy to reduce the spread of this  
52 disease.

53

## 54 **Introduction**

55 *Entamoeba histolytica* is a parasitic amoeba which infects an estimated 50 million  
56 people worldwide, resulting in around 70,000 deaths per year [1]. *E. histolytica* infection is  
57 known as amoebiasis and primarily affects the intestinal tract in humans, most commonly  
58 causing symptoms such as abdominal pain, bloody diarrhea, and colitis. In rare cases the  
59 infection spreads to other organs such as the liver and brain, and in serious cases results in  
60 patient death [2]. *E. histolytica*'s life cycle consists of a trophozoite vegetative stage which  
61 matures in its host to an infective cyst stage. The cyst stage is excreted in the host's feces,  
62 infecting a new host when ingested via a route such as drinking contaminated water. Due to this  
63 mode of transmission *E. histolytica* disproportionately affects populations experiencing  
64 sanitation problems associated with low socioeconomic status [2-4]. Malnutrition is also known  
65 to be a major risk factor for amoebiasis, especially in children [5]. In the majority of cases where  
66 *E. histolytica* is ingested it lives asymptotically in the human host's intestinal tract. Symptoms  
67 develop when compromise of the mucosal layer allows it to come into contact with the intestinal  
68 wall, at which point it invades the wall and surrounding tissue causing characteristic 'flask-  
69 shaped ulcers' [6].

70 *E. histolytica* infection is currently treated with the 5-nitroimidazole drug metronidazole,  
71 which has been in use since the 1960s and experiences widespread use as a treatment against  
72 anaerobic microbial infections. However, while successful, metronidazole is not a perfect  
73 treatment against *E. histolytica*, with a few particularly notable existing issues. One of these is  
74 problems with lack of patient compliance with the course of treatment, leading to relapses and  
75 increased disease spread [7]. This is possibly due to factors such as drug adverse effects or the

76 need for continued dosing past the resolution of disease symptoms [8]. Another issue is  
77 metronidazole's inability to kill the infective cyst stage of *E. histolytica*. Because of this, as well  
78 as its complete absorbance from the intestines, metronidazole must be followed by a secondary  
79 luminal amoebicide paromomycin to prevent spread of the disease [9, 10]. When considered  
80 together, these factors comprise an unmet need for alternative amoebiasis therapies to  
81 metronidazole. Efforts along these lines have recently begun to be undertaken, including the  
82 development of the antirheumatic drug auranofin as a promising potential treatment for  
83 amoebiasis [11-13].

84         The antimalarial mefloquine is a 4-methanolquinoline compound structurally more  
85 related to quinine than chloroquine. Like metronidazole, mefloquine is a successful and widely-  
86 used antiparasitic drug. In addition to its effectiveness against *Plasmodium falciparum* and *P.*  
87 *vivax* mefloquine has been shown over the years to possess *in vitro* or *in vivo* activity against  
88 *Trypanosoma*, *Schistosoma*, *Echinococcus*, and *Babesia* species [14-18]. As well as its  
89 effects on blood-stage malaria parasites, mefloquine is known for its ability to cross the blood-  
90 brain barrier, resulting in neuropsychiatric adverse events in some patients [19, 20]. Other  
91 notable pharmacokinetic attributes of mefloquine include a relatively long half-life and only  
92 partial absorption in the intestines, resulting in a profile potentially useful for persistent, invasive  
93 infections with a reservoir of parasites in the lumen [21, 22].

94         Based on these factors we decided to examine mefloquine for activity against *E.*  
95 *histolytica in vitro*. We utilized a luciferase-based cell viability assay to test potency and the  
96 rapidity of action of both mefloquine and metronidazole. We also tested mefloquine's ability to  
97 kill the cysts of the model organism *Entamoeba invadens in vitro*. We further discuss the  
98 implications of these findings as favorable for the use of mefloquine as a clinical antiamoebic  
99 drug.

100

101

## 102 **Materials and Methods**

103

### 104 ***E. histolytica* cell culture**

105 *E. histolytica* strain HM-1:IMSS trophozoites were maintained in 50ml culture flasks  
106 (Greiner Bio-One) containing TYI-S-33 media, 10% heat-inactivated adult bovine serum  
107 (Sigma), 1% MEM Vitamin Solution (Gibco), supplemented with penicillin (100 U/mL) and  
108 streptomycin (100 µg/mL) (Omega Scientific) [11].

109

### 110 **Cell viability assay to determine drug potency against *E. histolytica***

111 Following a previously-published approach [11] *E. histolytica* cells, maintained in the  
112 logarithmic phase of growth were seeded into 96-well plates (Greiner Bio-One) at 5,000  
113 cells/well to a total volume of 100 µl/well. 8- or 16-point two-fold dilution series of the treatment  
114 compounds were prepared, beginning at a maximum final treatment concentration of 50 µM. 0.5  
115 µl of each drug concentration was added to triplicate wells for each treatment group. 0.5 µl of  
116 DMSO was used as a negative control, and 0.5 µl of 10 mM metronidazole dissolved in DMSO  
117 was used as a positive control, giving a final concentration of 50 µM. Alternatively, wells with  
118 only media were used as a negative control. The plates were placed in GasPak EZ (Becton-  
119 Dickinson) bags and incubated at 37°C for 48hr. Plates were removed and 50 µl of CellTiter-Glo  
120 (Promega) was added to each well. Plates were shaken and incubated in darkness for 20  
121 minutes and the luminescence value of each well was read by a luminometer (EnVision,  
122 PerkinElmer). Percent inhibition was calculated by subtracting the luminescence values of each  
123 experimental data point from the average minimum signal, positive control values and dividing  
124 by the difference between the average maximum signal negative control and the positive  
125 control. The resulting decimal value was then multiplied by 100 to give a percentage.

126

## 127 **Trypan blue exclusion cell viability assay**

128 *E. histolytica* trophozoites were seeded into 96-well plates at 5,000 cells/well and treated  
129 in triplicates with two-fold serially-diluted mefloquine ranging from 6.25 to 0.10  $\mu$ M. Cells were  
130 incubated for 24 hr, then 10  $\mu$ L of cells from each desired well were combined with 10  $\mu$ l of  
131 trypan blue and the resulting mixture was counted with a hemocytometer.

132

## 133 **Determination of anti-amoebic drug effectiveness *in vitro* over time**

134 Effects of mefloquine and metronidazole on *E. histolytica* trophozoite cell viability were  
135 determined as described in a previous section at a series of timepoints ranging from 0.5 to 46  
136 hours following drug administration. EC<sub>50</sub> values were calculated at each timepoint as previously  
137 described.

138

## 139 **Microscopic observation of drug effects on cell morphology**

140 Confluent *E. histolytica* trophozoites were treated with 4  $\mu$ M of mefloquine in 50 mL  
141 culture flasks and observed over the course of 6 hours using brightfield microscopy (Zeiss).  
142 Representative images demonstrating cellular morphology were captured at 1-hour intervals  
143 from the beginning to the end of the experiment.

144

## 145 **Cyst killing assay**

146 For assays on mature cysts, a transgenic line stably expressing luciferase (CK-luc) was  
147 used [23]. Mature cyst viability assay was performed as previously described (Ehrenkaufer et al  
148 2018). Parasites were induced to encyst by incubation in encystation media (47% LG) [24]. After  
149 72 h, parasites were washed once in distilled water and incubated at 25°C for 4-5 h in water to  
150 lyse trophozoites. Purified cysts were pelleted, counted to ensure equal cyst numbers, and  
151 resuspended in encystation media at a concentration of 1-5x10<sup>5</sup> cells per ml. One ml

152 suspension per replicate was transferred to glass tubes containing encystation media and  
153 mefloquine or DMSO, then incubated at 25°C for 72 h. On the day of the assay, cysts were  
154 pelleted and treated once more with distilled water for 5 h to lyse any trophozoites that had  
155 emerged during treatment. Purified cysts were then resuspended in 75 µl Cell Lysis buffer  
156 (Promega) and sonicated for 2x10 seconds to break the cyst wall. Luciferase assay was  
157 performed using the Promega luciferase assay kit according to the manufacturer's instructions.  
158 Assays were performed on equal volume of lysate (35 µl) and not normalized to protein content.  
159 Effect of the drug was calculated by comparison to DMSO control, after subtraction of  
160 background signal.

161

162

## 163 **Results**

164

### 165 **Mefloquine is active against *E. histolytica* in-vitro**

166 In order to test mefloquine for potential antiamebic effects, an ATP-driven luciferase-  
167 based cell viability assay was employed to examine its effects on *E. histolytica* trophozoites *in*  
168 *vitro*. Two-fold serially-diluted concentration gradients were used to determine its 50% effective  
169 concentration (EC<sub>50</sub>) value. Maximum signal intensity was determined based on DMSO-treated  
170 cells, and minimum signal by cells treated with 50 µM metronidazole. From these values a cell  
171 survival percentage was calculated for each treatment dosage replicate. This experiment  
172 showed mefloquine to possess an EC<sub>50</sub> value of 1.1 µM [Figure 1], notable in contrast to the  
173 previously-obtained EC<sub>50</sub> value of 5 µM for metronidazole in the same *in vitro* assay system  
174 [11]. These results were replicated twice using both the same concentration range, as well as a  
175 range produced by a 1.5-fold serial dilution. Together these results suggested that mefloquine is

176 a potent anti-amoebic agent with greater *in vitro* efficacy than the current gold-standard  
177 treatment against *E. histolytica*.

178

179

### 180 **Fig 1. Antiamoebic activity of mefloquine**

181 Dose response curve showing the percent inhibition of *E. histolytica* trophozoites treated  
182 with mefloquine relative to vehicle-treated control.

183

184

### 185 **Mefloquine is amoebicidal against *E. histolytica***

186 In order to determine whether the reduced number of viable cells in mefloquine-treated  
187 groups was due to increased cell death or merely decreased cell replication, a trypan blue  
188 exclusion assay was employed. The results of this assay confirmed the effects of mefloquine to  
189 be amoebicidal rather than amoebistatic, with the ratio of trypan-blue-permeable cells increasing  
190 with increasing drug concentration. A maximum of 100% cell staining, indicating 100% cell  
191 death, was observed at 6.25  $\mu\text{M}$  of mefloquine. [Figure 2A]

192

### 193 **Fig 2. Amoebicidal activity of mefloquine**

194 A) Percent cell death of *E. histolytica* trophozoites at 24 h in response to mefloquine  
195 treatment as quantified by trypan blue exclusion assay. B) Decline in total average trophozoite  
196 cell number per well after 4  $\mu\text{M}$  mefloquine treatment as compared to either 1  $\mu\text{M}$  mefloquine,  
197 10  $\mu\text{M}$  metronidazole, 0.5% DMSO, or no treatment.

198

199 The total number of live cells was observed over the course of mefloquine treatment  
200 using the same luciferase assay as previously. Replicate experimental plates were prepared  
201 and readings taken from each plate at several timepoints over the course of 7 hours.



202 Luminescence values obtained from control wells to which known quantities of live cells had  
203 been added were used to determine the total number of viable cells in experimental groups. In  
204 the experimental groups, trophozoites treated with 4  $\mu$ M mefloquine decreased in number by a  
205 factor of five over the course of the experiments, whereas all other groups increased, including  
206 both negative controls, and those treated with 10  $\mu$ M metronidazole. [Figure 2B] These results  
207 indicate that mefloquine reduces *E. histolytica* trophozoite numbers by causing cell death, rather  
208 than simply impeding or reducing replication.

209

210

### 211 **Effect of mefloquine on *E. histolytica* morphology**

212 The morphology of *E. histolytica* trophozoites was observed after mefloquine treatment  
213 using phase contrast light microscope and compared with observations of 0.5% DMSO-treated  
214 cells. DMSO-treated trophozoites were visibly motile and irregular in shape, possessing  
215 characteristic amoeboid pseudopodia. In contrast, cells treated with 4  $\mu$ M mefloquine for 6 hours  
216 were universally swollen and rounded, with dramatically enlarged vacuoles. [Figure 3]

217

### 218 **Fig 3. Effects of mefloquine treatment on *E. histolytica* morphology**

219 Light microscopy images of DMSO-treated *E. histolytica* trophozoites (Left) and  
220 trophozoites treated with 4  $\mu$ M of mefloquine for 6 hours (Right).

221

222

### 223 **Mefloquine kills *E. histolytica* much more rapidly than metronidazole**

224 To further characterize the temporal aspects of the anti-amoebic effects of mefloquine,  
225 the EC<sub>50</sub> values of mefloquine and metronidazole were measured at a series of timepoints after  
226 treatment of *E. histolytica* trophozoites with different concentrations of mefloquine and

227 metronidazole. The same luciferase-based cell viability assay was used as previously to  
228 determine the percentage of cells killed in each set of experimental replicates. Duplicate plates  
229 containing cells treated with serially-diluted ranges of mefloquine concentrations were prepared  
230 for each desired timepoint. From the collected data the EC<sub>50</sub> values were calculated and  
231 compared over time. Mefloquine was observed to achieve its full effectiveness as characterized  
232 by its final steady-state EC<sub>50</sub> value of 1.1 µM within less than 10 hours. In contrast,  
233 metronidazole required more than 24 hours to achieve its own final value of 5 µM. [Figure 4]  
234 These results suggest that the mechanism by which mefloquine kills *E. histolytica* trophozoites  
235 is inherently more rapid than that of metronidazole.

236

#### 237 **Fig 4. Comparison of antiamebic activities of mefloquine and metronidazole over time**

238 A) Dose response curves of mefloquine-treated *E. histolytica* trophozoites plotted at a  
239 series of timepoints subsequent to the start of treatment. B) Dose response curves of  
240 metronidazole-treated *E. histolytica* trophozoites plotted at a series of timepoints subsequent to  
241 the start of treatment. C) EC<sub>50</sub> values for mefloquine (solid line) and metronidazole (dashed line)  
242 changing over time following the addition of each drug, eventually reaching constant values.  
243 Note: no meaningful EC<sub>50</sub> value was observable in the metronidazole treatment prior to 10.5  
244 hours

245

246

#### 247 **Mefloquine kills mature *Entamoeba* cysts**

248 A major drawback of metronidazole as a treatment for amebiasis is its poor activity  
249 against luminal parasites and cysts [2]. To determine if mefloquine may be superior in this  
250 respect, we assayed for killing of mature *Entamoeba* cysts. As *E. histolytica* cannot be induced  
251 to encyst *in vitro* [24], the related parasite, *E. invadens*, a well-characterized model system for  
252 *Entamoeba* development, was utilized. Mature (72h) cysts of a transgenic line constitutively

253 expressing luciferase were treated with either 5  $\mu$ M or 10  $\mu$ M mefloquine, or 0.5% DMSO as  
254 negative control, for 3 days. After treatment, cysts were treated with distilled water for five  
255 hours to remove any remaining trophozoites, and luciferase activity was assayed. Both  
256 concentrations of mefloquine significantly reduced luciferase signal to less than 10% compared  
257 to the control (Figure 5), indicating that the drug is effectively killing the cysts. In contrast,  
258 metronidazole up to 20  $\mu$ M had no effect [Figure 5].

259

### 260 **Figure 5. Drug activity against mature cysts**

261 Plot displaying percentage of luciferase signal from *E. invadens* cysts treated with  
262 mefloquine or metronidazole, compared with DMSO-treated negative controls. Control readings  
263 were measured for each individual trial, which are in turn denoted by markers. metronidazole  
264 was tested at 20  $\mu$ M concentration, mefloquine at both 5  $\mu$ M and 10  $\mu$ M.

265

266

### 267 **Discussion**

268 In this study the FDA-approved antimalarial drug mefloquine was shown to kill *E.*  
269 *histolytica* trophozoites *in vitro* more potently and rapidly than the current standard therapy,  
270 metronidazole. It was also shown to kill the cyst form of related parasite *E. invadens*, which  
271 metronidazole does not. Here we will discuss how these results reveal mefloquine to have  
272 strong potential for use as an antiamebic drug, and how in such a role it could fill gaps in the  
273 existing therapeutic paradigm for *E. histolytica* infections, reducing both the impact and spread  
274 of this disease.

275 The current drug of choice against *E. histolytica* infection, metronidazole, is cheap,  
276 effective, and widely used against several anaerobic pathogens [2]. However, two major

277 concerns exist with metronidazole which render the search for additional options highly  
278 advisable.

279         The first concern with metronidazole therapy is patient noncompliance due to both  
280 adverse effects and the requirement for dosage past symptom improvement. Reported  
281 noncompliance has been linked with increased recurrence and prevalence of the disease and  
282 has been shown to be increased in populations known to be at greater risk for infection [8]. We  
283 found that mefloquine achieves its amoebicidal effects *in vitro* much more rapidly than  
284 metronidazole, a favorable characteristic which could result in much shorter and hence less  
285 onerous clinical dosing schedules, which in turn could partially alleviate patient noncompliance.  
286 Regarding dosage, we found a concentration of 3  $\mu\text{M}$  to kill nearly 100% of *E. histolytica*  
287 trophozoites after 48 hours. Mefloquine is currently prescribed in doses of 1250 mg for cases of  
288 acute malaria, and previous studies have shown lower doses than this to be capable of  
289 producing plasma  $C_{\text{max}}$  values above the 3  $\mu\text{M}$  level [21]. Additionally, the half-life of mefloquine  
290 has been shown to be up to 12 days, in contrast to a reported value of only 8 hours for  
291 metronidazole [21, 25]. All of this points to the idea that one or a small number of doses could  
292 potentially produce the desired therapeutic effects in humans that currently require many more  
293 doses of metronidazole.

294         The second concern is the inability of metronidazole to kill or prevent development of the  
295 infective cyst stage of *Entamoeba*. Due to its extremely high intestinal absorption, all of  
296 metronidazole's action is systemic rather than in the lumen where a reservoir of reproducing  
297 and encysting *E. histolytica* resides. It quite effectively kills invasive trophozoites but allows the  
298 parasite's reproductive cycle to continue, enabling the infection of other hosts. To prevent this,  
299 metronidazole therapy must be followed by treatment with a luminal antiamoebic drug such as  
300 paromomycin, which is potent in that location but not absorbed systemically at all [9, 10]. The  
301 current therapeutic strategy thus relies on the sequential administration of two separate drugs  
302 each with opposite absorption profiles in order to effectively control both the symptoms and

303 spread of amoebiasis. Such a lengthy and complex treatment no doubt greatly aggravates the  
304 issues with patient noncompliance described in the first concern. In this study we documented  
305 features of mefloquine which might allow it to circumvent this dual-drug issue. We tested  
306 mefloquine for effectiveness against the cyst form of *E. invadens* and found it to be active. *E.*  
307 *invadens* is a similar parasite to *E. histolytica* and is widely used as an *in vitro* model of  
308 encystation for *E. histolytica* [26]. In this study it was found that mefloquine was capable of  
309 killing 100% of *E. invadens* cysts at 5  $\mu$ M, a value close to that observed to kill *E. histolytica*  
310 trophozoites. Importantly, unlike metronidazole, around 20-30% of mefloquine remains in the  
311 intestines of patients after absorption, raising the possibility that it could act as a luminal  
312 antiamoebic against both cysts and trophozoites [22]. As such mefloquine has the potential to fill  
313 the cysticidal and amoebicidal roles required for successful treatment of *E. histolytica* infection.

314 Mefloquine's systemic distribution includes the ability to cross the blood-brain barrier – a  
315 feature which has both negative and positive consequences [27]. Negatively, mefloquine is  
316 known for producing neuropsychiatric adverse effects in a subset of patients [28]. Positively,  
317 mefloquine's ability to enter the brain allows it to act against parasites that have invaded that  
318 region. While most literature on the subject involves combinations of mefloquine with other  
319 drugs such as artesunate for treatment of clinical or experimental cerebral malaria, cases have  
320 been reported where mefloquine alone has been successful in patients [29, 30]. Like malaria  
321 parasites, *E. histolytica* invades the brain in a small number of extreme cases [31]. Mefloquine's  
322 ability to cross the blood-brain barrier might allow it to act as an effective treatment in such  
323 cases. This would add to the overall versatility and usefulness of mefloquine as an antiamoebic  
324 drug.

325 Given the results of this study a key question remaining is the nature of mefloquine's  
326 mechanism of action against *E. histolytica*. In *Plasmodium* species as well as various other cell  
327 types a number of hypotheses have been proposed. These hypotheses range from the inhibition  
328 of plasma membrane dynamics to the induction of reactive oxygen species stress [32-36]. One

329 particular hypothesis raised by two papers from the past decade proposed that mefloquine  
330 might act against *Plasmodium* parasites through inhibition of the cytosolic ribosome and  
331 resultant suppression of protein translation [37, 38]. While these studies do support the idea that  
332 mefloquine may act at least partially via such a mechanism in *Plasmodium*, it is unclear whether  
333 ribosomal inhibition might also be lethal in *E. histolytica*. Some clues regarding the answer to  
334 this question come from existing compounds known to kill *E. histolytica*. The drug paromomycin,  
335 currently prescribed as a luminal amoebicide, is known to act through ribosomal inhibition  
336 against both bacteria and *Leishmania* species [39, 40]. Additionally, potent activity of the  
337 ribosomal inhibitor anisomycin against *E. histolytica* trophozoites and *E. invadens* cysts has  
338 recently been reported [13]. Together these drug activities confirm that compounds targeting the  
339 ribosomal complex are capable of killing *E. histolytica*, rendering it conceivable that such a  
340 mechanism might be at work with the effects of mefloquine. Future studies should explore this  
341 possibility, as well as investigate ribosome-targeting compounds as a possible class of  
342 amoebicides.

343 In conclusion we demonstrated *in vitro* that the FDA-approved antimalarial drug  
344 mefloquine has the potential to act as a new treatment option for *E. histolytica* infection.  
345 Mefloquine is superior to the current practice, due to greater potency, rapidity of action, and  
346 cysticidal effects. Further studies using *in vivo* models of the disease should be undertaken to  
347 refine the optimal dosage and duration of treatment.

348

349

## 350 **Acknowledgments**

351 The authors of this study would like to thank Dr. Jim McKerrow and the Center for  
352 Discovery and Innovation in Parasitic Diseases at the Skaggs School of Pharmacy at the

353 University of California - San Diego as well as Da Shi, Lily Hahn, and Abdolhakim Mohammed  
354 for their contributions to this work.

355

356

## 357 **References**

358 1. Shirley DT, Farr L, Watanabe K, Moonah S. A Review of the Global Burden, New  
359 Diagnostics, and Current Therapeutics for Amebiasis. *Open forum infectious diseases*.  
360 2018;5(7):ofy161.

361 2. Pritt BS, Clark CG. Amebiasis. *Mayo Clin Proc*. 2008;83(10):1154-9; quiz 9-60.

362 3. Faria CP, Zanini GM, Dias GS, da Silva S, de Freitas MB, Almendra R, et al. Geospatial  
363 distribution of intestinal parasitic infections in Rio de Janeiro (Brazil) and its association with  
364 social determinants. *PLoS Negl Trop Dis*. 2017;11(3):e0005445.

365 4. Sahimin N, Lim YA, Ariffin F, Behnke JM, Lewis JW, Mohd Zain SN. Migrant Workers in  
366 Malaysia: Current Implications of Sociodemographic and Environmental Characteristics in the  
367 Transmission of Intestinal Parasitic Infections. *PLoS Negl Trop Dis*. 2016;10(11):e0005110.

368 5. Verkerke HP, Petri WA, Jr., Marie CS. The dynamic interdependence of amebiasis,  
369 innate immunity, and undernutrition. *Semin Immunopathol*. 2012;34(6):771-85.

370 6. Ralston KS, Petri WA, Jr. Tissue destruction and invasion by *Entamoeba histolytica*.  
371 *Trends in parasitology*. 2011;27(6):254-63.

372 7. Dusengeyezu E, Kadima J. How do Metronidazole Drawbacks Impact Patient  
373 Compliance and Therapeutic Outcomes in Treating Amoebiasis in Rwanda. *International*  
374 *Journal of TROPICAL DISEASE & Health*. 2016;17(3):1-7.

- 375 8. Garduno-Espinosa J, Martinez-Garcia MC, Fajardo-Gutierrez A, Ortega-Alvarez M,  
376 Alvarez-Espinosa A, Vega-Perez V, et al. Frequency and risk factors associated with  
377 metronidazole therapeutic noncompliance. *Revista de investigacion clinica; organo del Hospital*  
378 *de Enfermedades de la Nutricion*. 1992;44(2):235-40.
- 379 9. Kikuchi T, Koga M, Shimizu S, Miura T, Maruyama H, Kimura M. Efficacy and safety of  
380 paromomycin for treating amebiasis in Japan. *Parasitology international*. 2013;62(6):497-501.
- 381 10. Blessmann J, Tannich E. Treatment of asymptomatic intestinal *Entamoeba histolytica*  
382 infection. *The New England journal of medicine*. 2002;347(17):1384.
- 383 11. Debnath A, Parsonage D, Andrade RM, He C, Cobo ER, Hirata K, et al. A high-  
384 throughput drug screen for *Entamoeba histolytica* identifies a new lead and target. *Nat Med*.  
385 2012;18(6):956-60.
- 386 12. Bashyal B, Li L, Bains T, Debnath A, LaBarbera DV. *Larrea tridentata*: A novel source  
387 for anti-parasitic agents active against *Entamoeba histolytica*, *Giardia lamblia* and *Naegleria*  
388 *fowleri*. *PLoS Negl Trop Dis*. 2017;11(8):e0005832.
- 389 13. Ehrenkauf GM, Suresh S, Solow-Cordero D, Singh U. High-Throughput Screening of  
390 *Entamoeba* Identifies Compounds Which Target Both Life Cycle Stages and Which Are  
391 Effective Against Metronidazole Resistant Parasites. *Front Cell Infect Microbiol*. 2018;8:276.
- 392 14. Crouch AA, Seow WK, Thong YH. Effect of twenty-three chemotherapeutic agents on  
393 the adherence and growth of *Giardia lamblia* in vitro. *Transactions of the Royal Society of*  
394 *Tropical Medicine and Hygiene*. 1986;80(6):893-6.



- 395 15. Planer JD, Hulverson MA, Arif JA, Ranade RM, Don R, Buckner FS. Synergy testing of  
396 FDA-approved drugs identifies potent drug combinations against *Trypanosoma cruzi*. *PLoS*  
397 *Negl Trop Dis*. 2014;8(7):e2977.
- 398 16. Xiao SH. Mefloquine, a new type of compound against schistosomes and other  
399 helminthes in experimental studies. *Parasitol Res*. 2013;112(11):3723-40.
- 400 17. Liu C, Zhang H, Yin J, Hu W. In vivo and in vitro efficacies of mebendazole, mefloquine  
401 and nitazoxanide against cyst echinococcosis. *Parasitol Res*. 2015;114(6):2213-22.
- 402 18. Munkhjargal T, AbouLaila M, Terkawi MA, Sivakumar T, Ichikawa M, Davaasuren B, et  
403 al. Inhibitory effects of pepstatin A and mefloquine on the growth of *Babesia* parasites. *Am J*  
404 *Trop Med Hyg*. 2012;87(4):681-8.
- 405 19. Greenwood BM, Fidock DA, Kyle DE, Kappe SH, Alonso PL, Collins FH, et al. Malaria:  
406 progress, perils, and prospects for eradication. *The Journal of clinical investigation*.  
407 2008;118(4):1266-76.
- 408 20. Schlagenhauf P. Mefloquine for malaria chemoprophylaxis 1992-1998: a review. *Journal*  
409 *of travel medicine*. 1999;6(2):122-33.
- 410 21. Karbwang J, Na Bangchang K, Thanavibul A, Back DJ, Bunnag D, Harinasuta T.  
411 Pharmacokinetics of mefloquine alone or in combination with artesunate. *Bulletin of the World*  
412 *Health Organization*. 1994;72(1):83-7.
- 413 22. Looareesuwan S, White NJ, Warrell DA, Forgo I, Dubach UG, Ranalder UB, et al.  
414 Studies of mefloquine bioavailability and kinetics using a stable isotope technique: a comparison  
415 of Thai patients with falciparum malaria and healthy Caucasian volunteers. *British journal of*  
416 *clinical pharmacology*. 1987;24(1):37-42.

- 417 23. Ehrenkaufer GM, Singh U. Transient and stable transfection in the protozoan parasite  
418 *Entamoeba invadens*. *Mol Biochem Parasitol*. 2012;184(1):59-62.
- 419 24. Sanchez L, Enea V, Eichinger D. Identification of a developmentally regulated transcript  
420 expressed during encystation of *Entamoeba invadens*. *Mol Biochem Parasitol*. 1994;67(1):125-  
421 35.
- 422 25. Welling PG, Monro AM. The pharmacokinetics of metronidazole and tinidazole in man.  
423 *Arzneimittel-Forschung*. 1972;22(12):2128-32.
- 424 26. Ehrenkaufer GM, Weedall GD, Williams D, Lorenzi HA, Caler E, Hall N, et al. The  
425 genome and transcriptome of the enteric parasite *Entamoeba invadens*, a model for  
426 encystation. *Genome biology*. 2013;14(7):R77.
- 427 27. Pham YT, Nosten F, Farinotti R, White NJ, Gimenez F. Cerebral uptake of mefloquine  
428 enantiomers in fatal cerebral malaria. *International journal of clinical pharmacology and*  
429 *therapeutics*. 1999;37(1):58-61.
- 430 28. Lee SJ, Ter Kuile FO, Price RN, Luxemburger C, Nosten F. Adverse effects of  
431 mefloquine for the treatment of uncomplicated malaria in Thailand: A pooled analysis of 19, 850  
432 individual patients. *PloS one*. 2017;12(2):e0168780.
- 433 29. Di Perri G, Olliaro P, Ward S, Allegranzi B, Bonora S, Concia E. Rapid absorption and  
434 clinical effectiveness of intragastric mefloquine in the treatment of cerebral malaria in African  
435 children. *The Journal of antimicrobial chemotherapy*. 1999;44(4):573-6.
- 436 30. Sun HY, Fang CT, Wang JT, Kuo PH, Chen YC, Chang SC. Successful treatment of  
437 imported cerebral malaria with artesunate-mefloquine combination therapy. *Journal of the*  
438 *Formosan Medical Association = Taiwan yi zhi*. 2006;105(1):86-9.

- 439 31. Petri WA, Haque R. Entamoeba histolytica brain abscess. Handbook of clinical  
440 neurology. 2013;114:147-52.
- 441 32. Fitch CD. Ferriprotoporphyrin IX, phospholipids, and the antimalarial actions of quinoline  
442 drugs. Life sciences. 2004;74(16):1957-72.
- 443 33. Gunjan S, Singh SK, Sharma T, Dwivedi H, Chauhan BS, Imran Siddiqi M, et al.  
444 Mefloquine induces ROS mediated programmed cell death in malaria parasite: Plasmodium.  
445 Apoptosis : an international journal on programmed cell death. 2016;21(9):955-64.
- 446 34. Paivandy A, Calounova G, Zarnegar B, Ohrvik H, Melo FR, Pejler G. Mefloquine, an  
447 anti-malaria agent, causes reactive oxygen species-dependent cell death in mast cells via a  
448 secretory granule-mediated pathway. Pharmacology research & perspectives.  
449 2014;2(6):e00066.
- 450 35. Yadav N, Dwivedi A, Mujtaba SF, Verma A, Chaturvedi R, Ray RS, et al.  
451 Photosensitized mefloquine induces ROS-mediated DNA damage and apoptosis in  
452 keratinocytes under ambient UVB and sunlight exposure. Cell biology and toxicology.  
453 2014;30(5):253-68.
- 454 36. Yan KH, Yao CJ, Hsiao CH, Lin KH, Lin YW, Wen YC, et al. Mefloquine exerts  
455 anticancer activity in prostate cancer cells via ROS-mediated modulation of Akt, ERK, JNK and  
456 AMPK signaling. Oncology letters. 2013;5(5):1541-5.
- 457 37. Gamo FJ, Sanz LM, Vidal J, de Cozar C, Alvarez E, Lavandera JL, et al. Thousands of  
458 chemical starting points for antimalarial lead identification. Nature. 2010;465(7296):305-10.

459 38. Wong W, Bai XC, Sleebs BE, Triglia T, Brown A, Thompson JK, et al. Mefloquine targets  
460 the Plasmodium falciparum 80S ribosome to inhibit protein synthesis. Nat Microbiol.  
461 2017;2:17031.

462 39. Shalev-Benami M, Zhang Y, Rozenberg H, Nobe Y, Taoka M, Matzov D, et al. Atomic  
463 resolution snapshot of Leishmania ribosome inhibition by the aminoglycoside paromomycin.  
464 Nature communications. 2017;8(1):1589.

465 40. Tok JB, Bi L. Aminoglycoside and its derivatives as ligands to target the ribosome.  
466 Current topics in medicinal chemistry. 2003;3(9):1001-19.

467

468 **S1 Table. Figure 1 data**

469

470 **S2 Table. Figure 2A data**

471

472 **S3 Table. Figure 2B data**

473

474 **S4 Table. Figure 4 data**

475

476 **S5 Table. Figure 5 data**

477

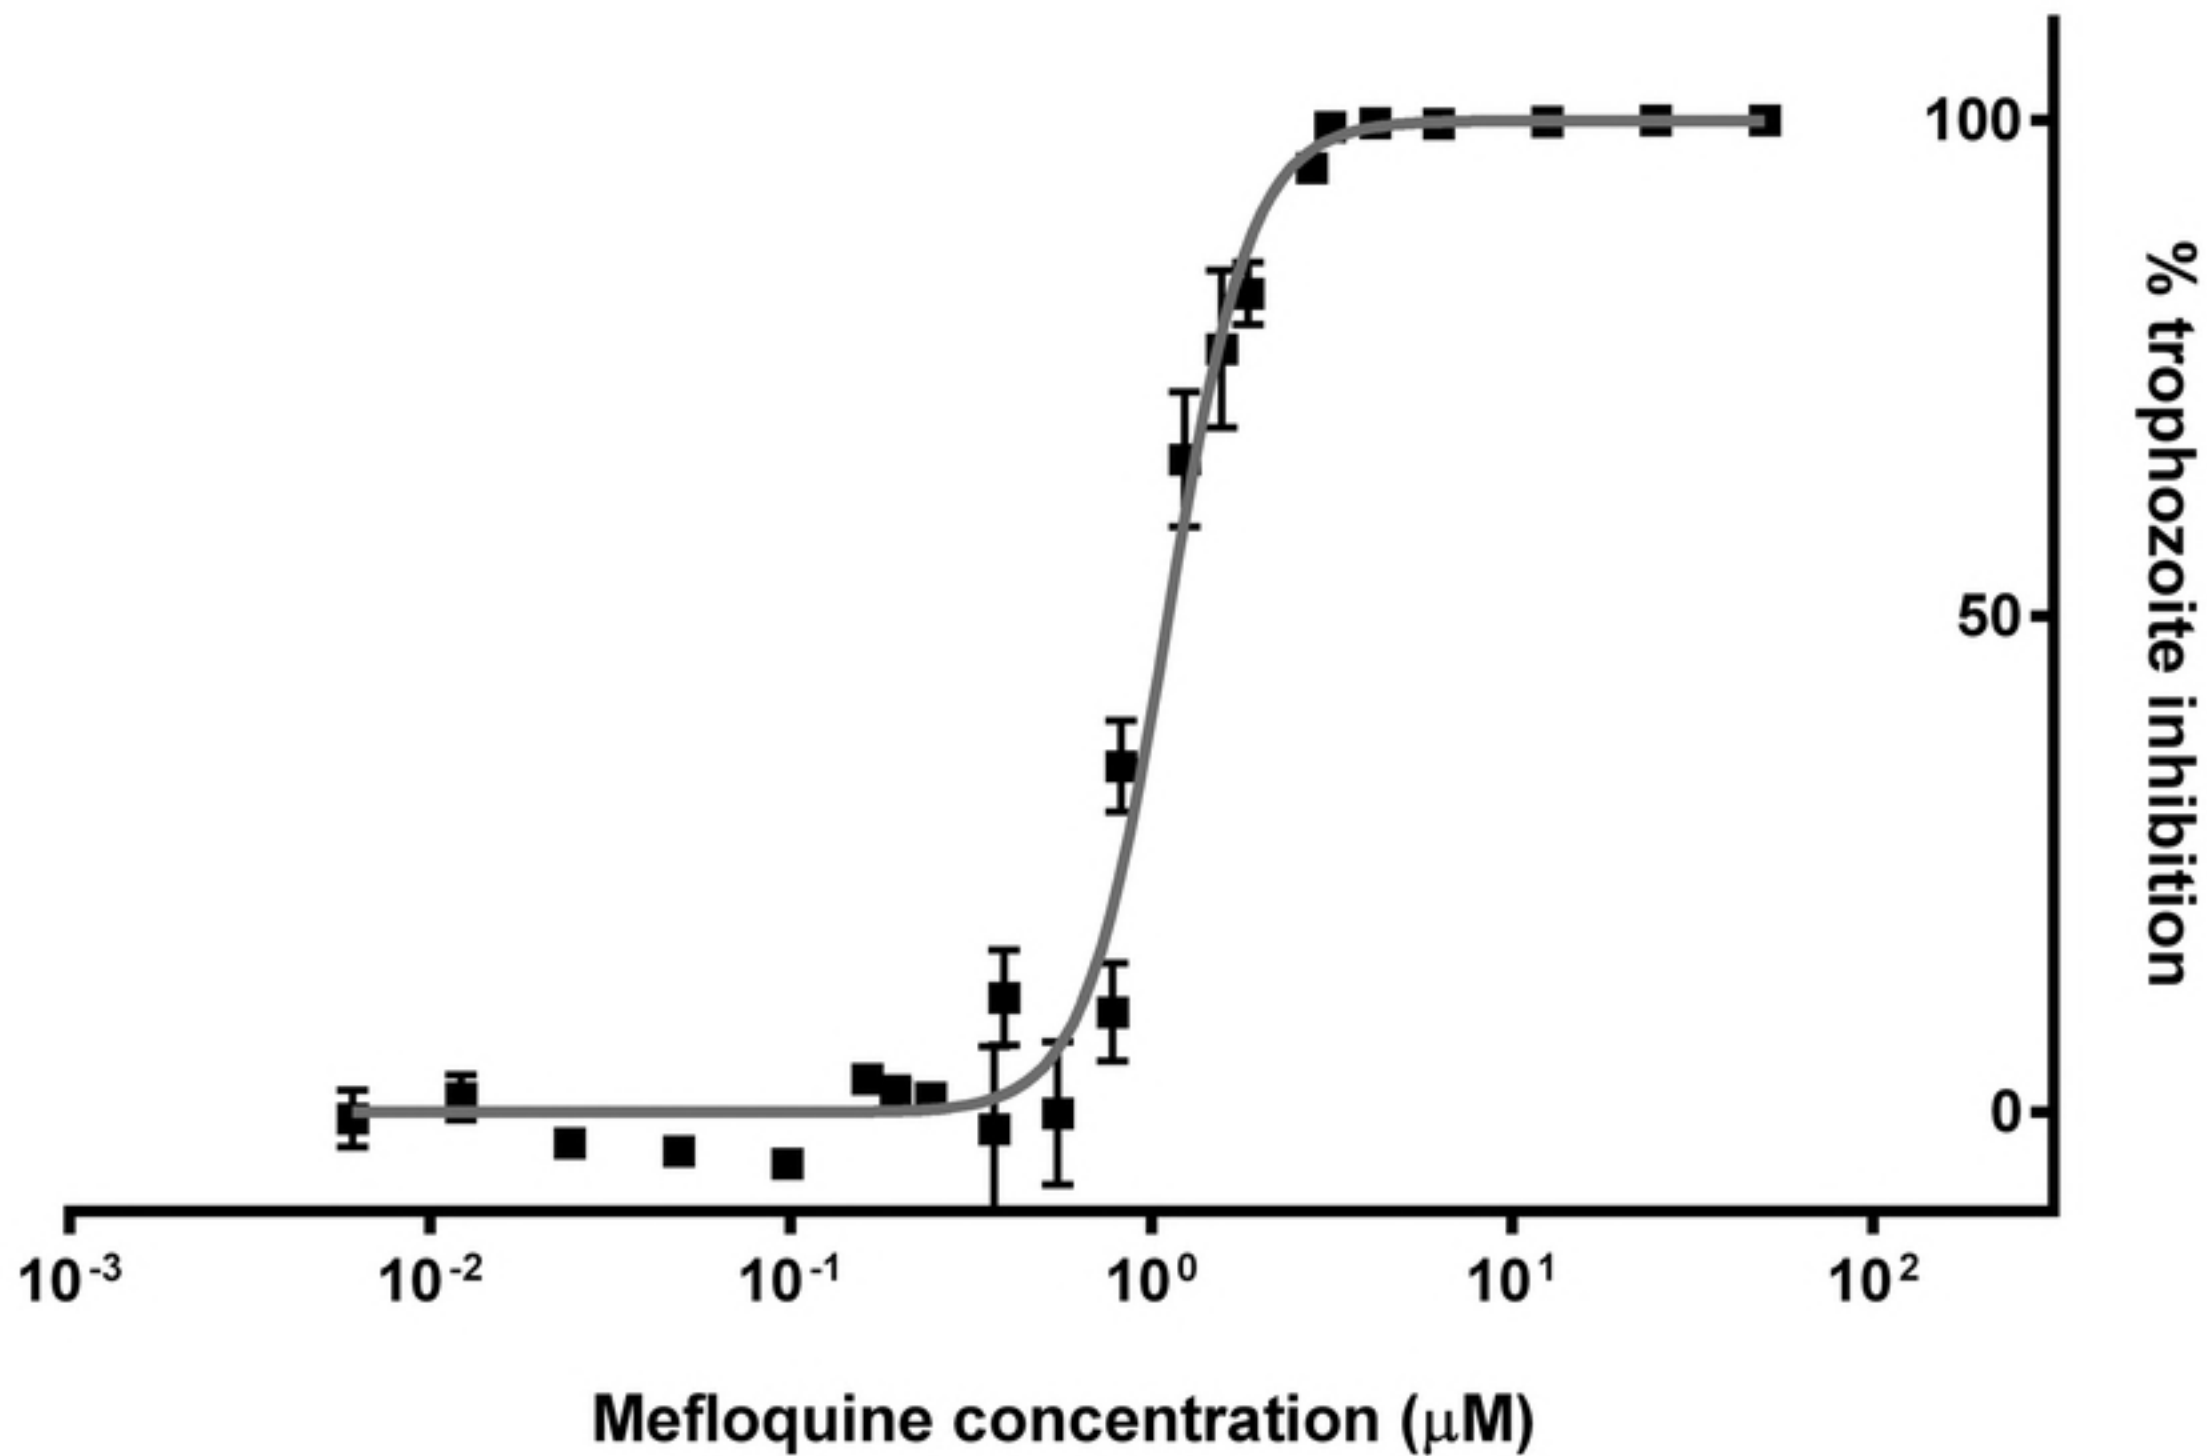

Figure 1

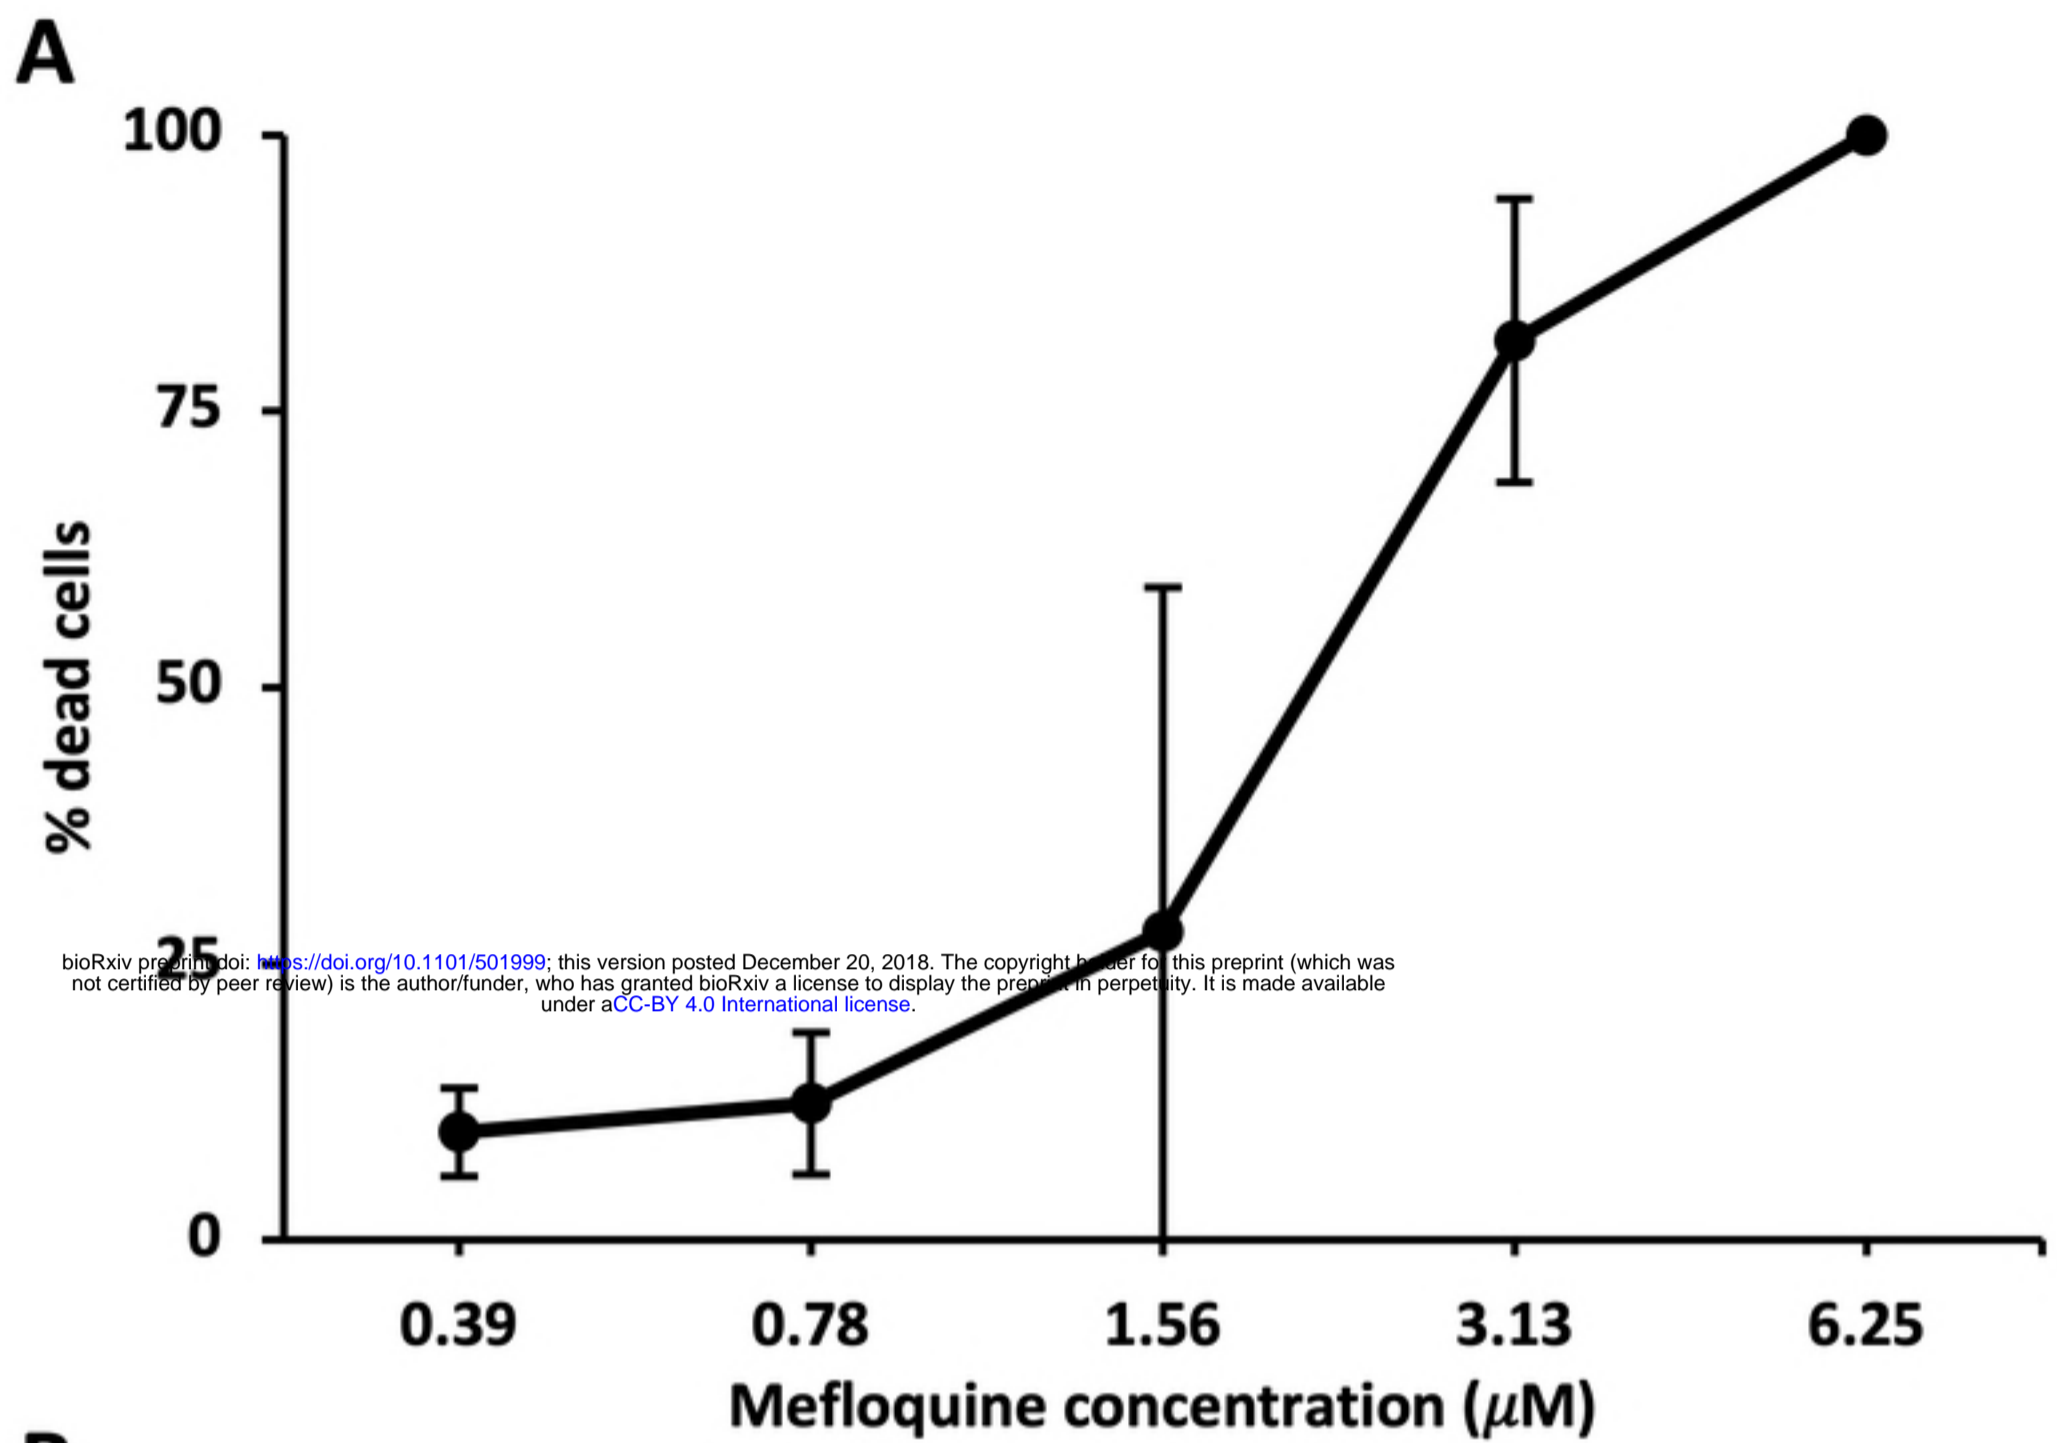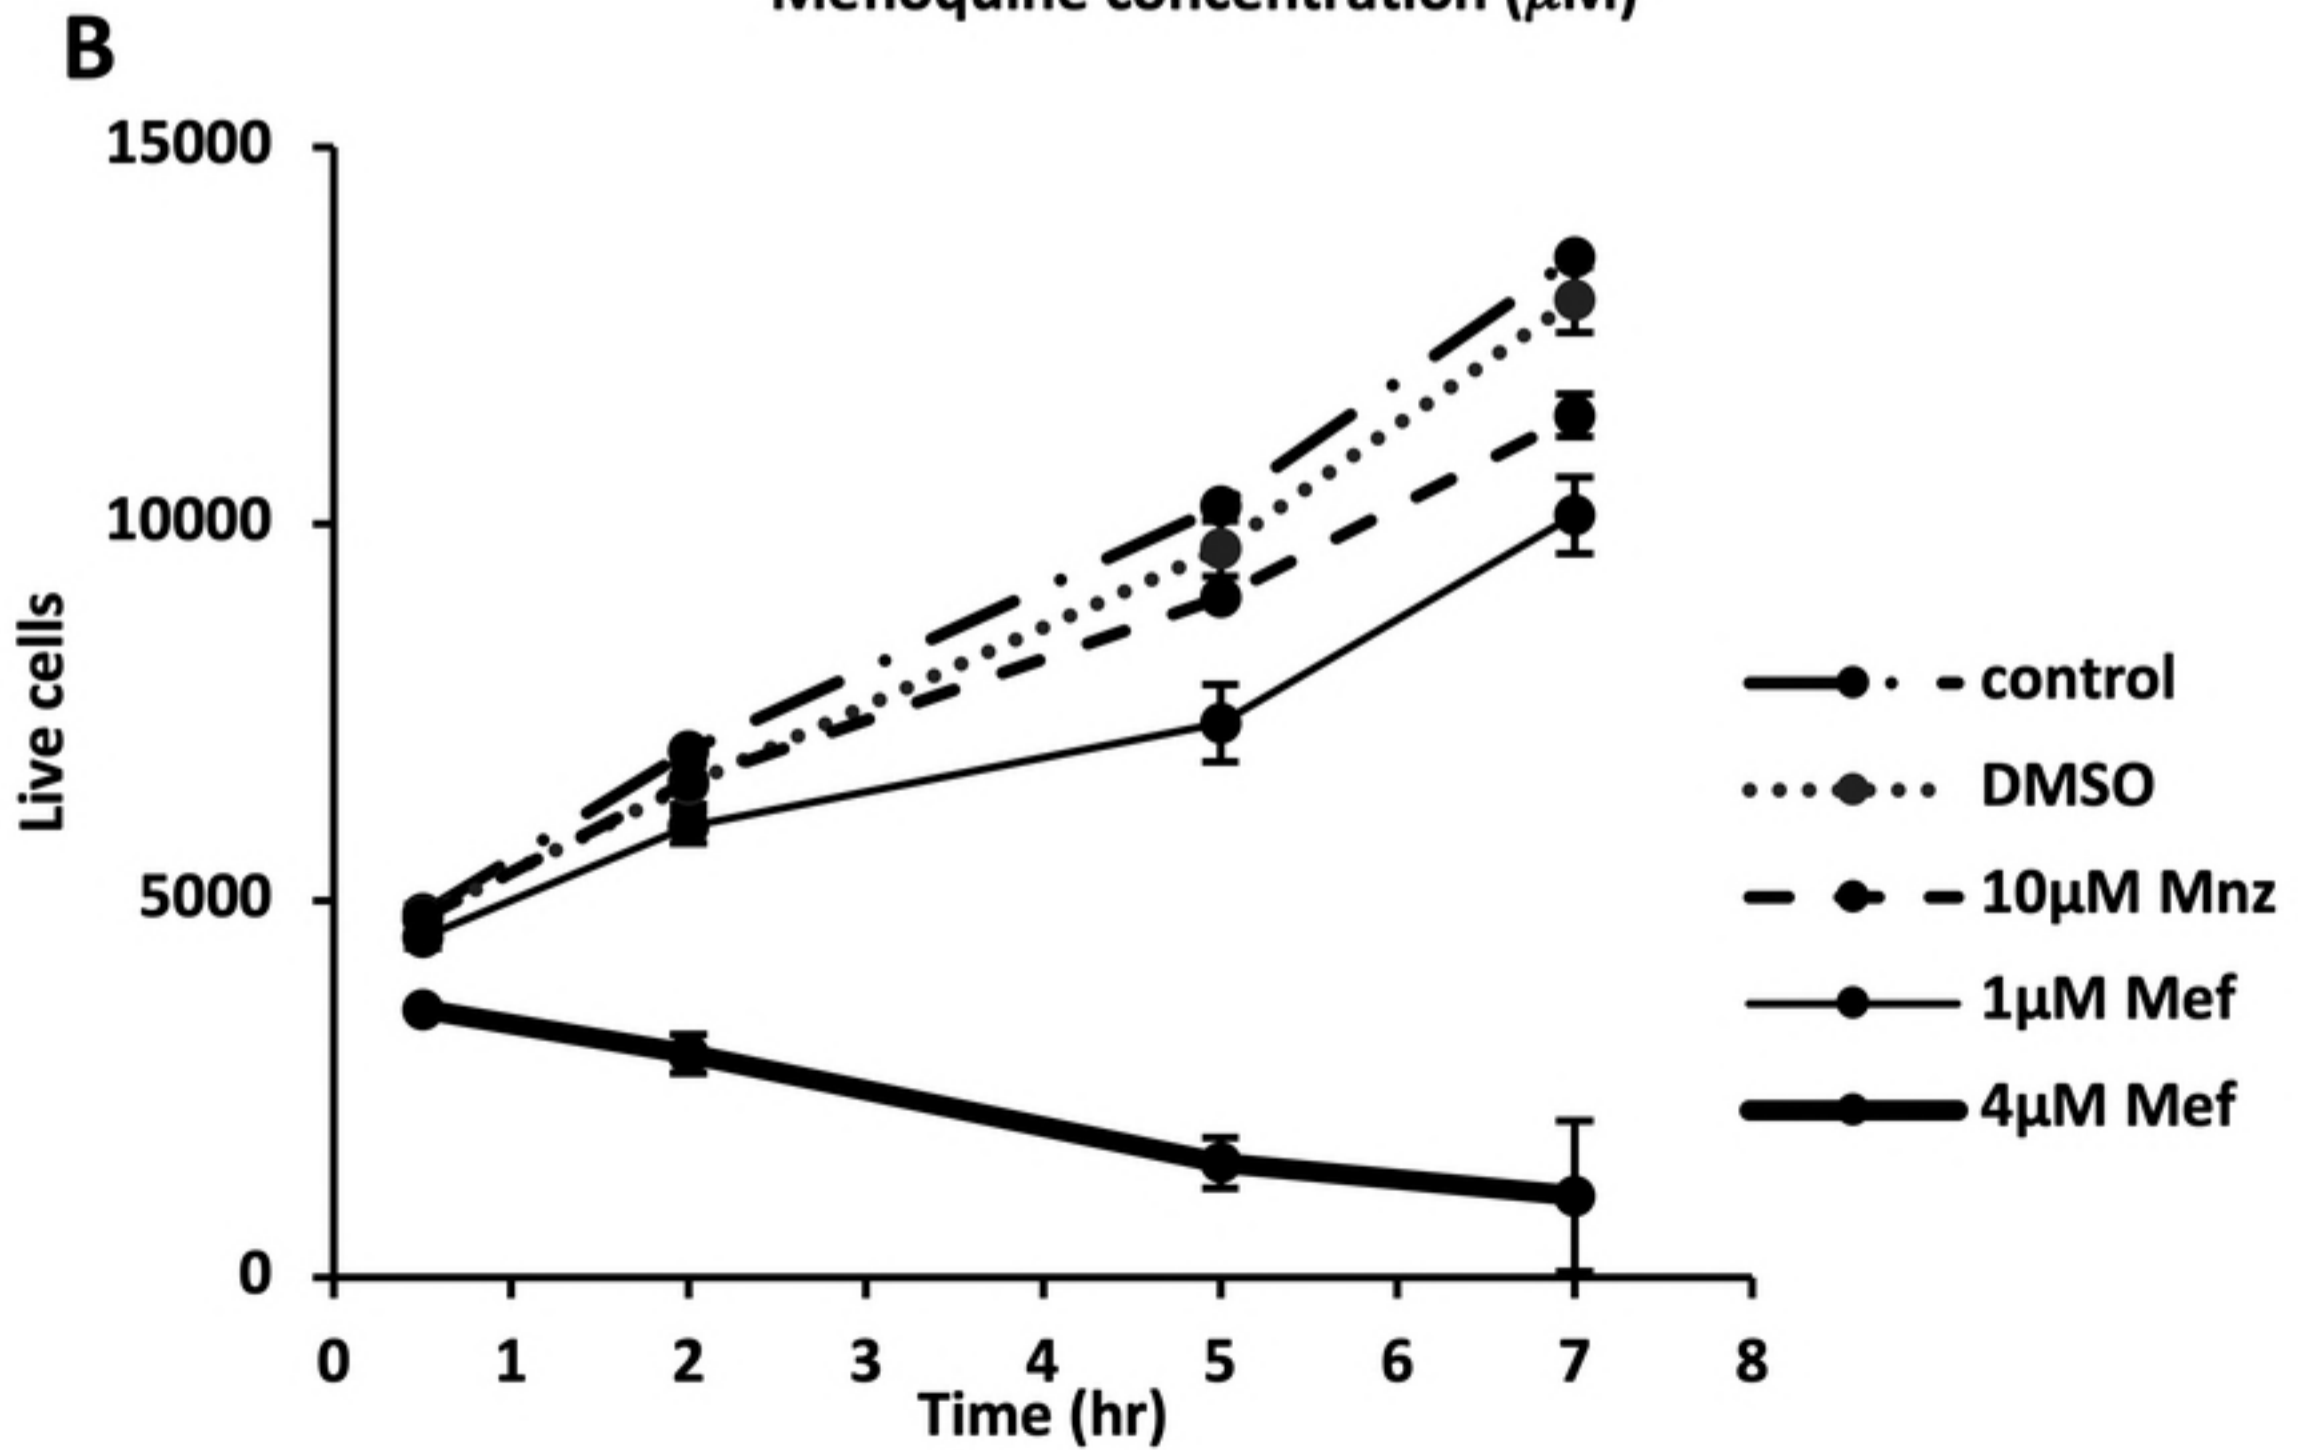

Figure 2

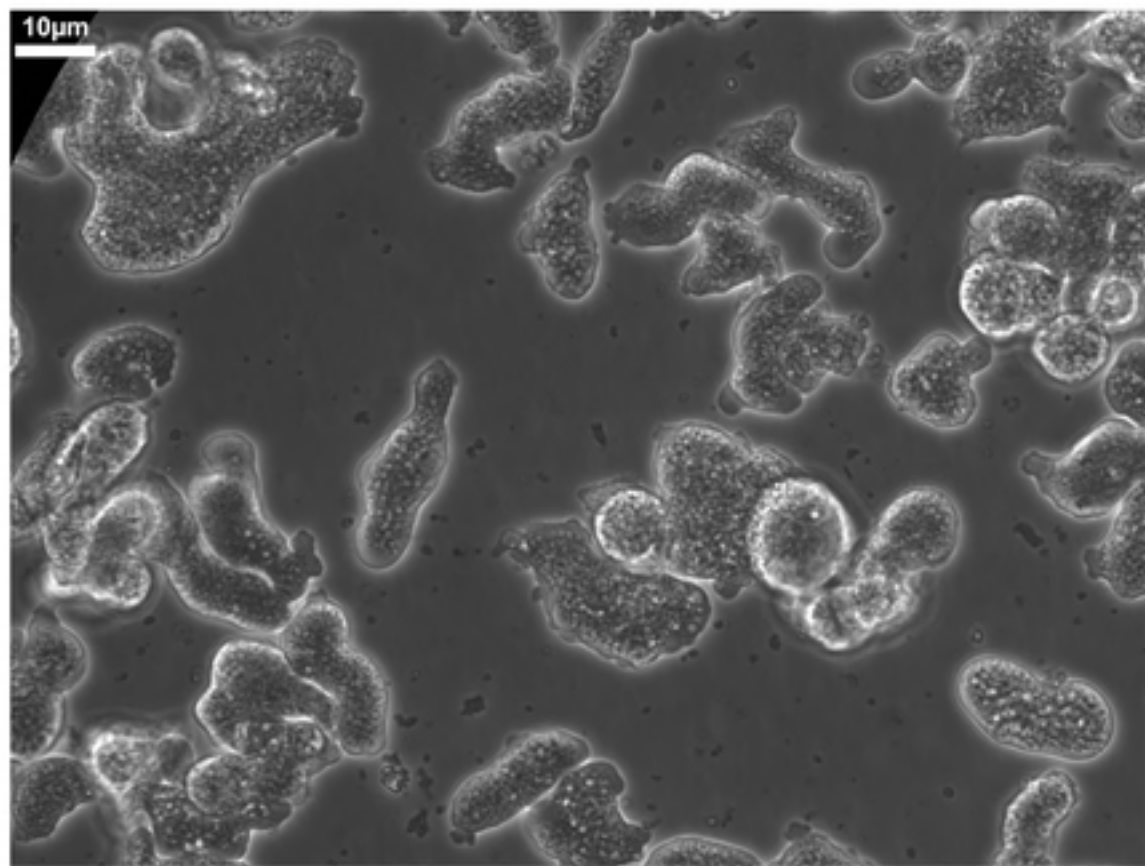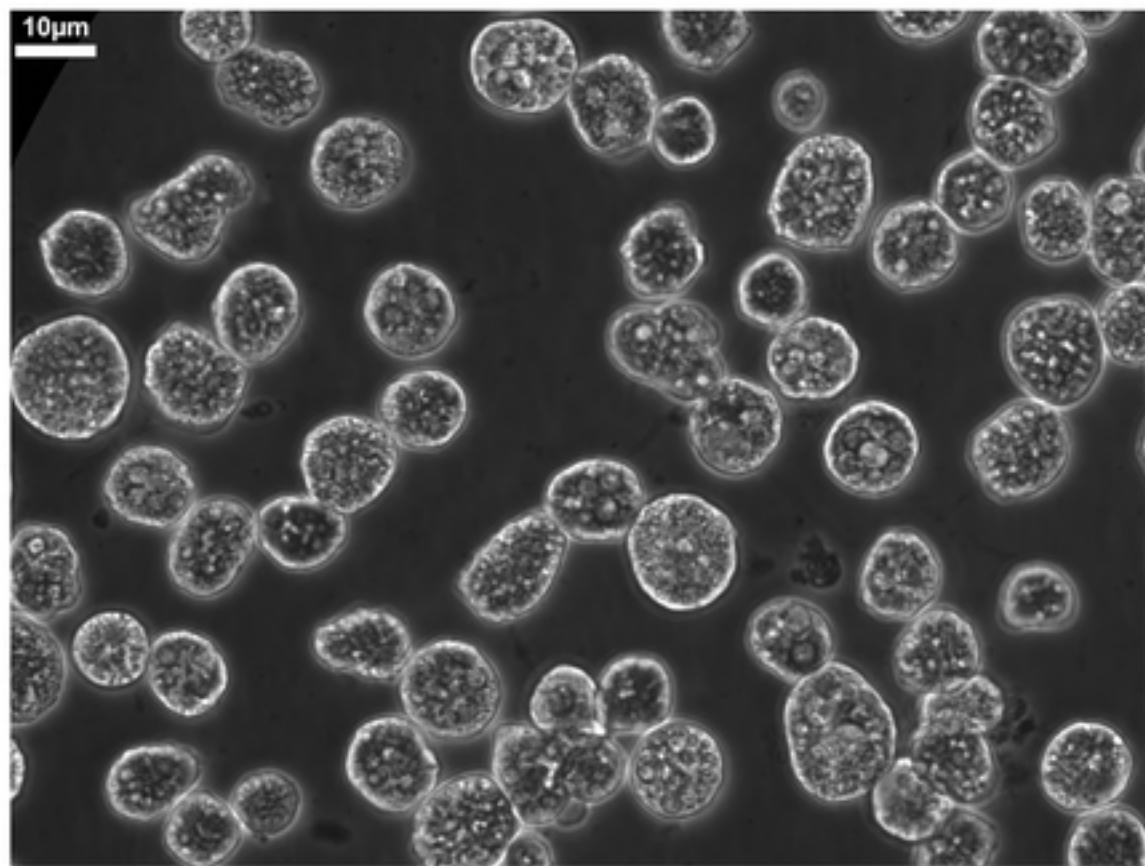

Figure 3

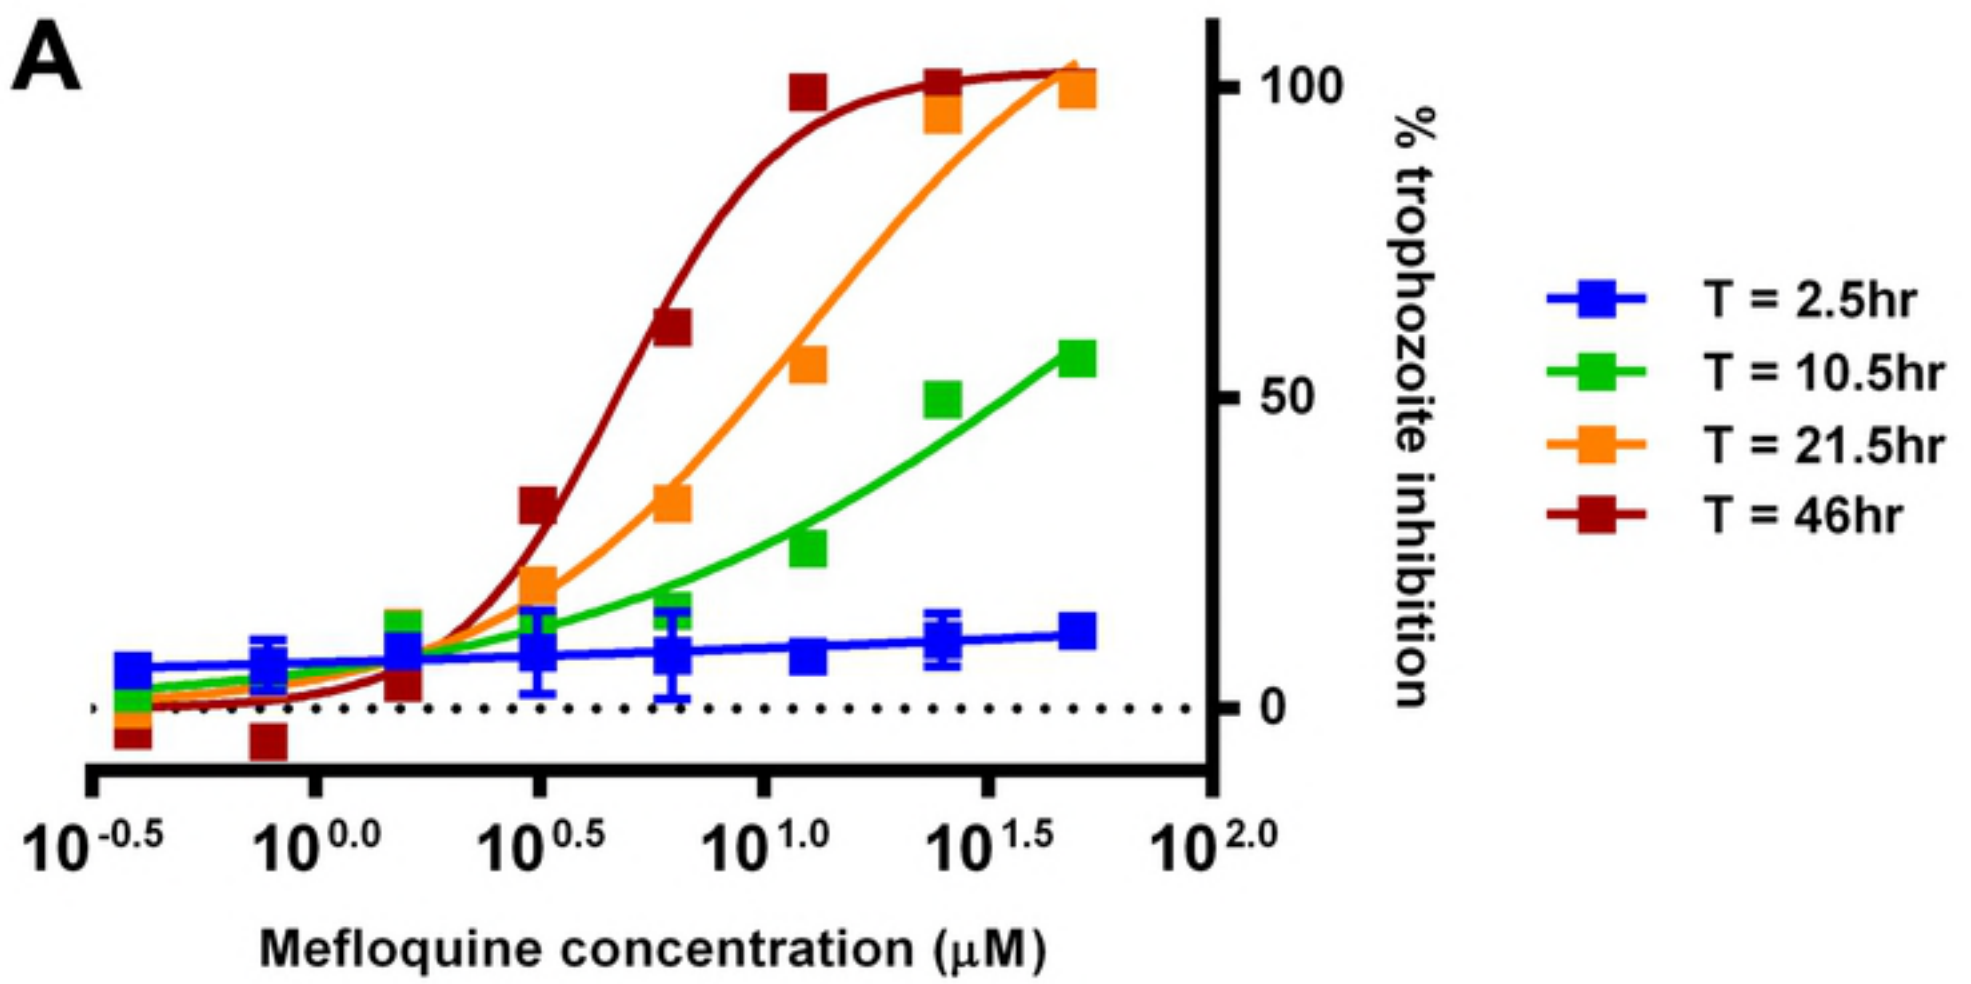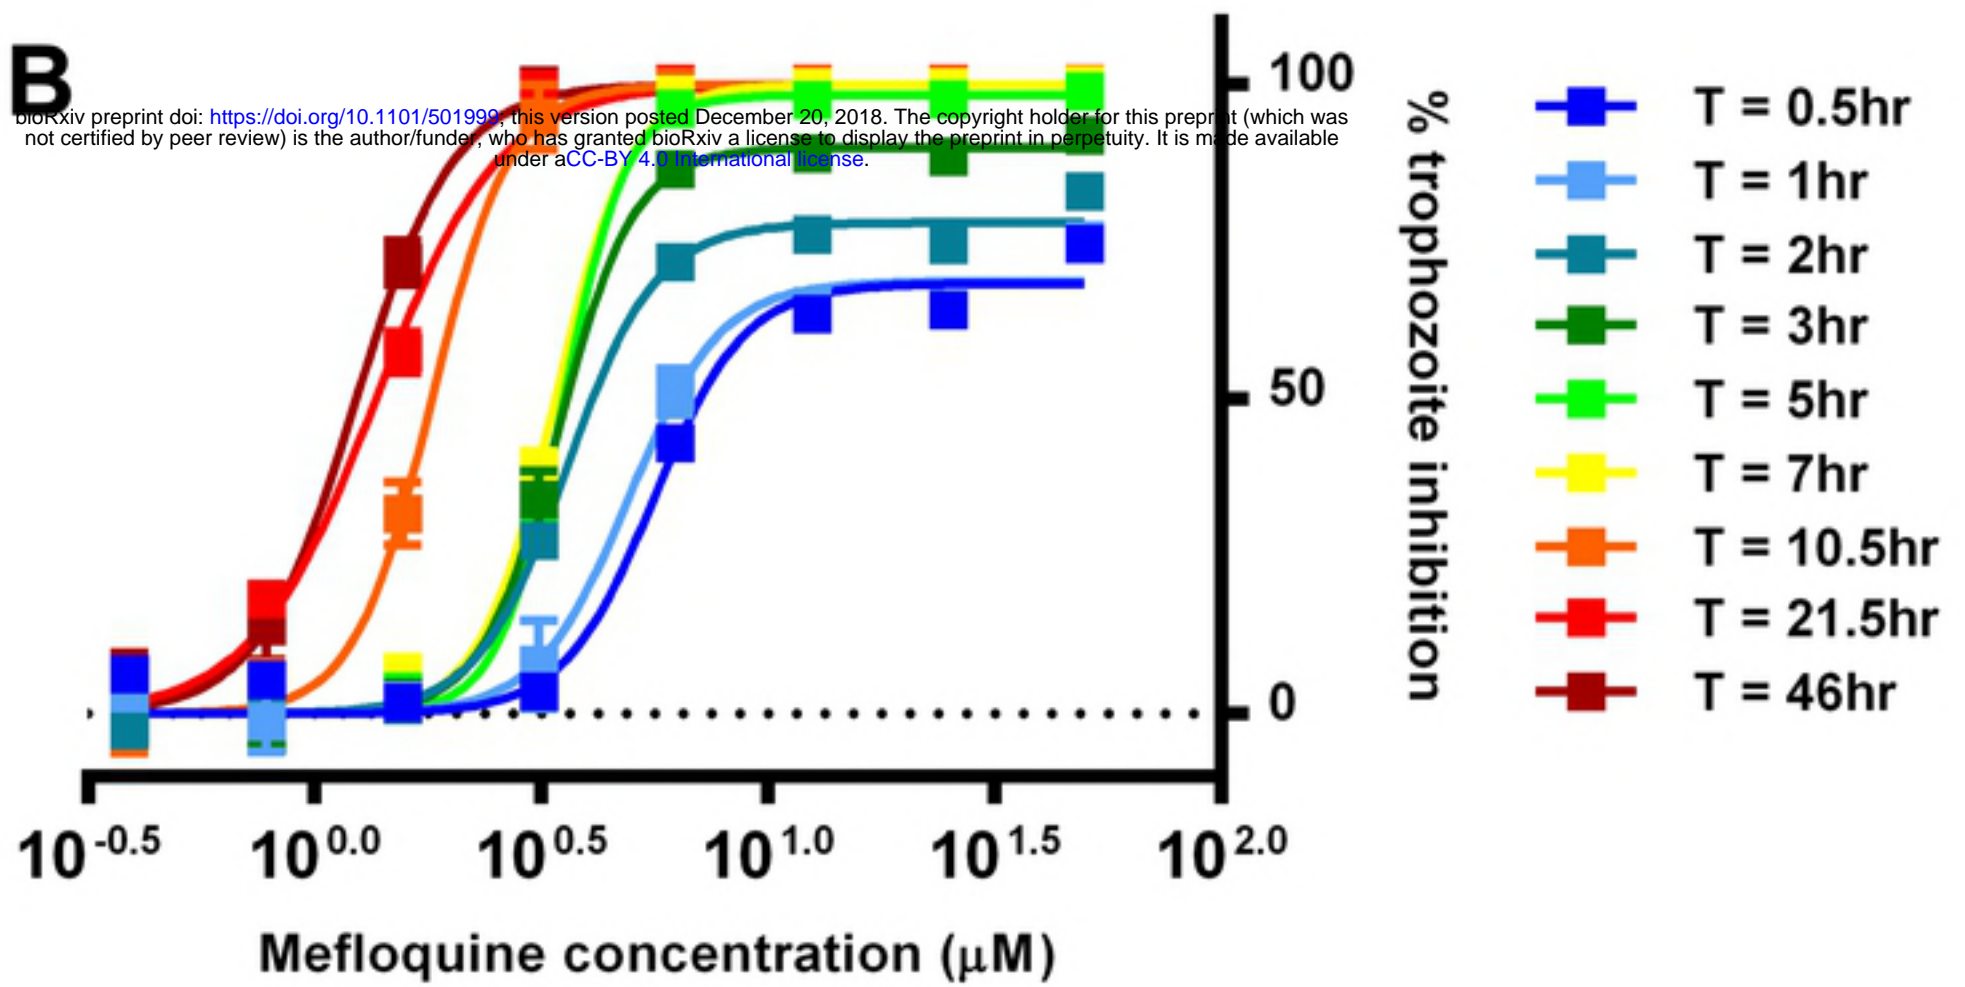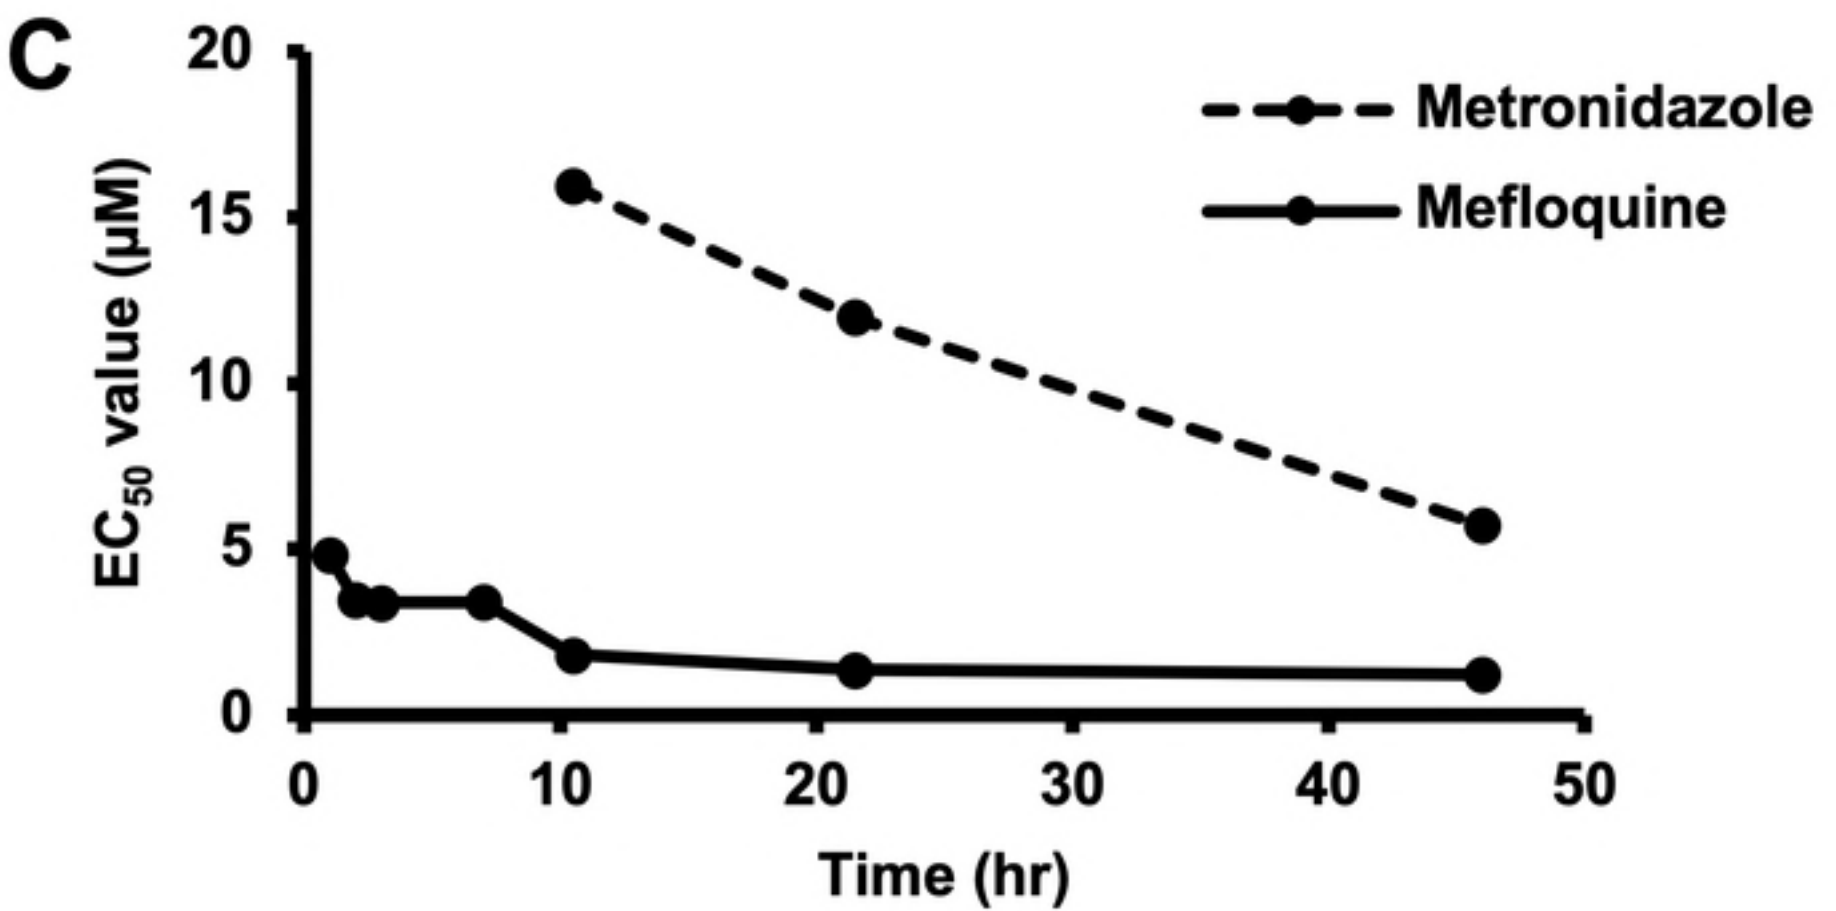

Figure 4



bioRxiv preprint doi: <https://doi.org/10.1101/501999>; this version posted December 20, 2018. The copyright holder for this preprint (which was not certified by peer review) is the author/funder, who has granted bioRxiv a license to display the preprint in perpetuity. It is made available under aCC-BY 4.0 International license.

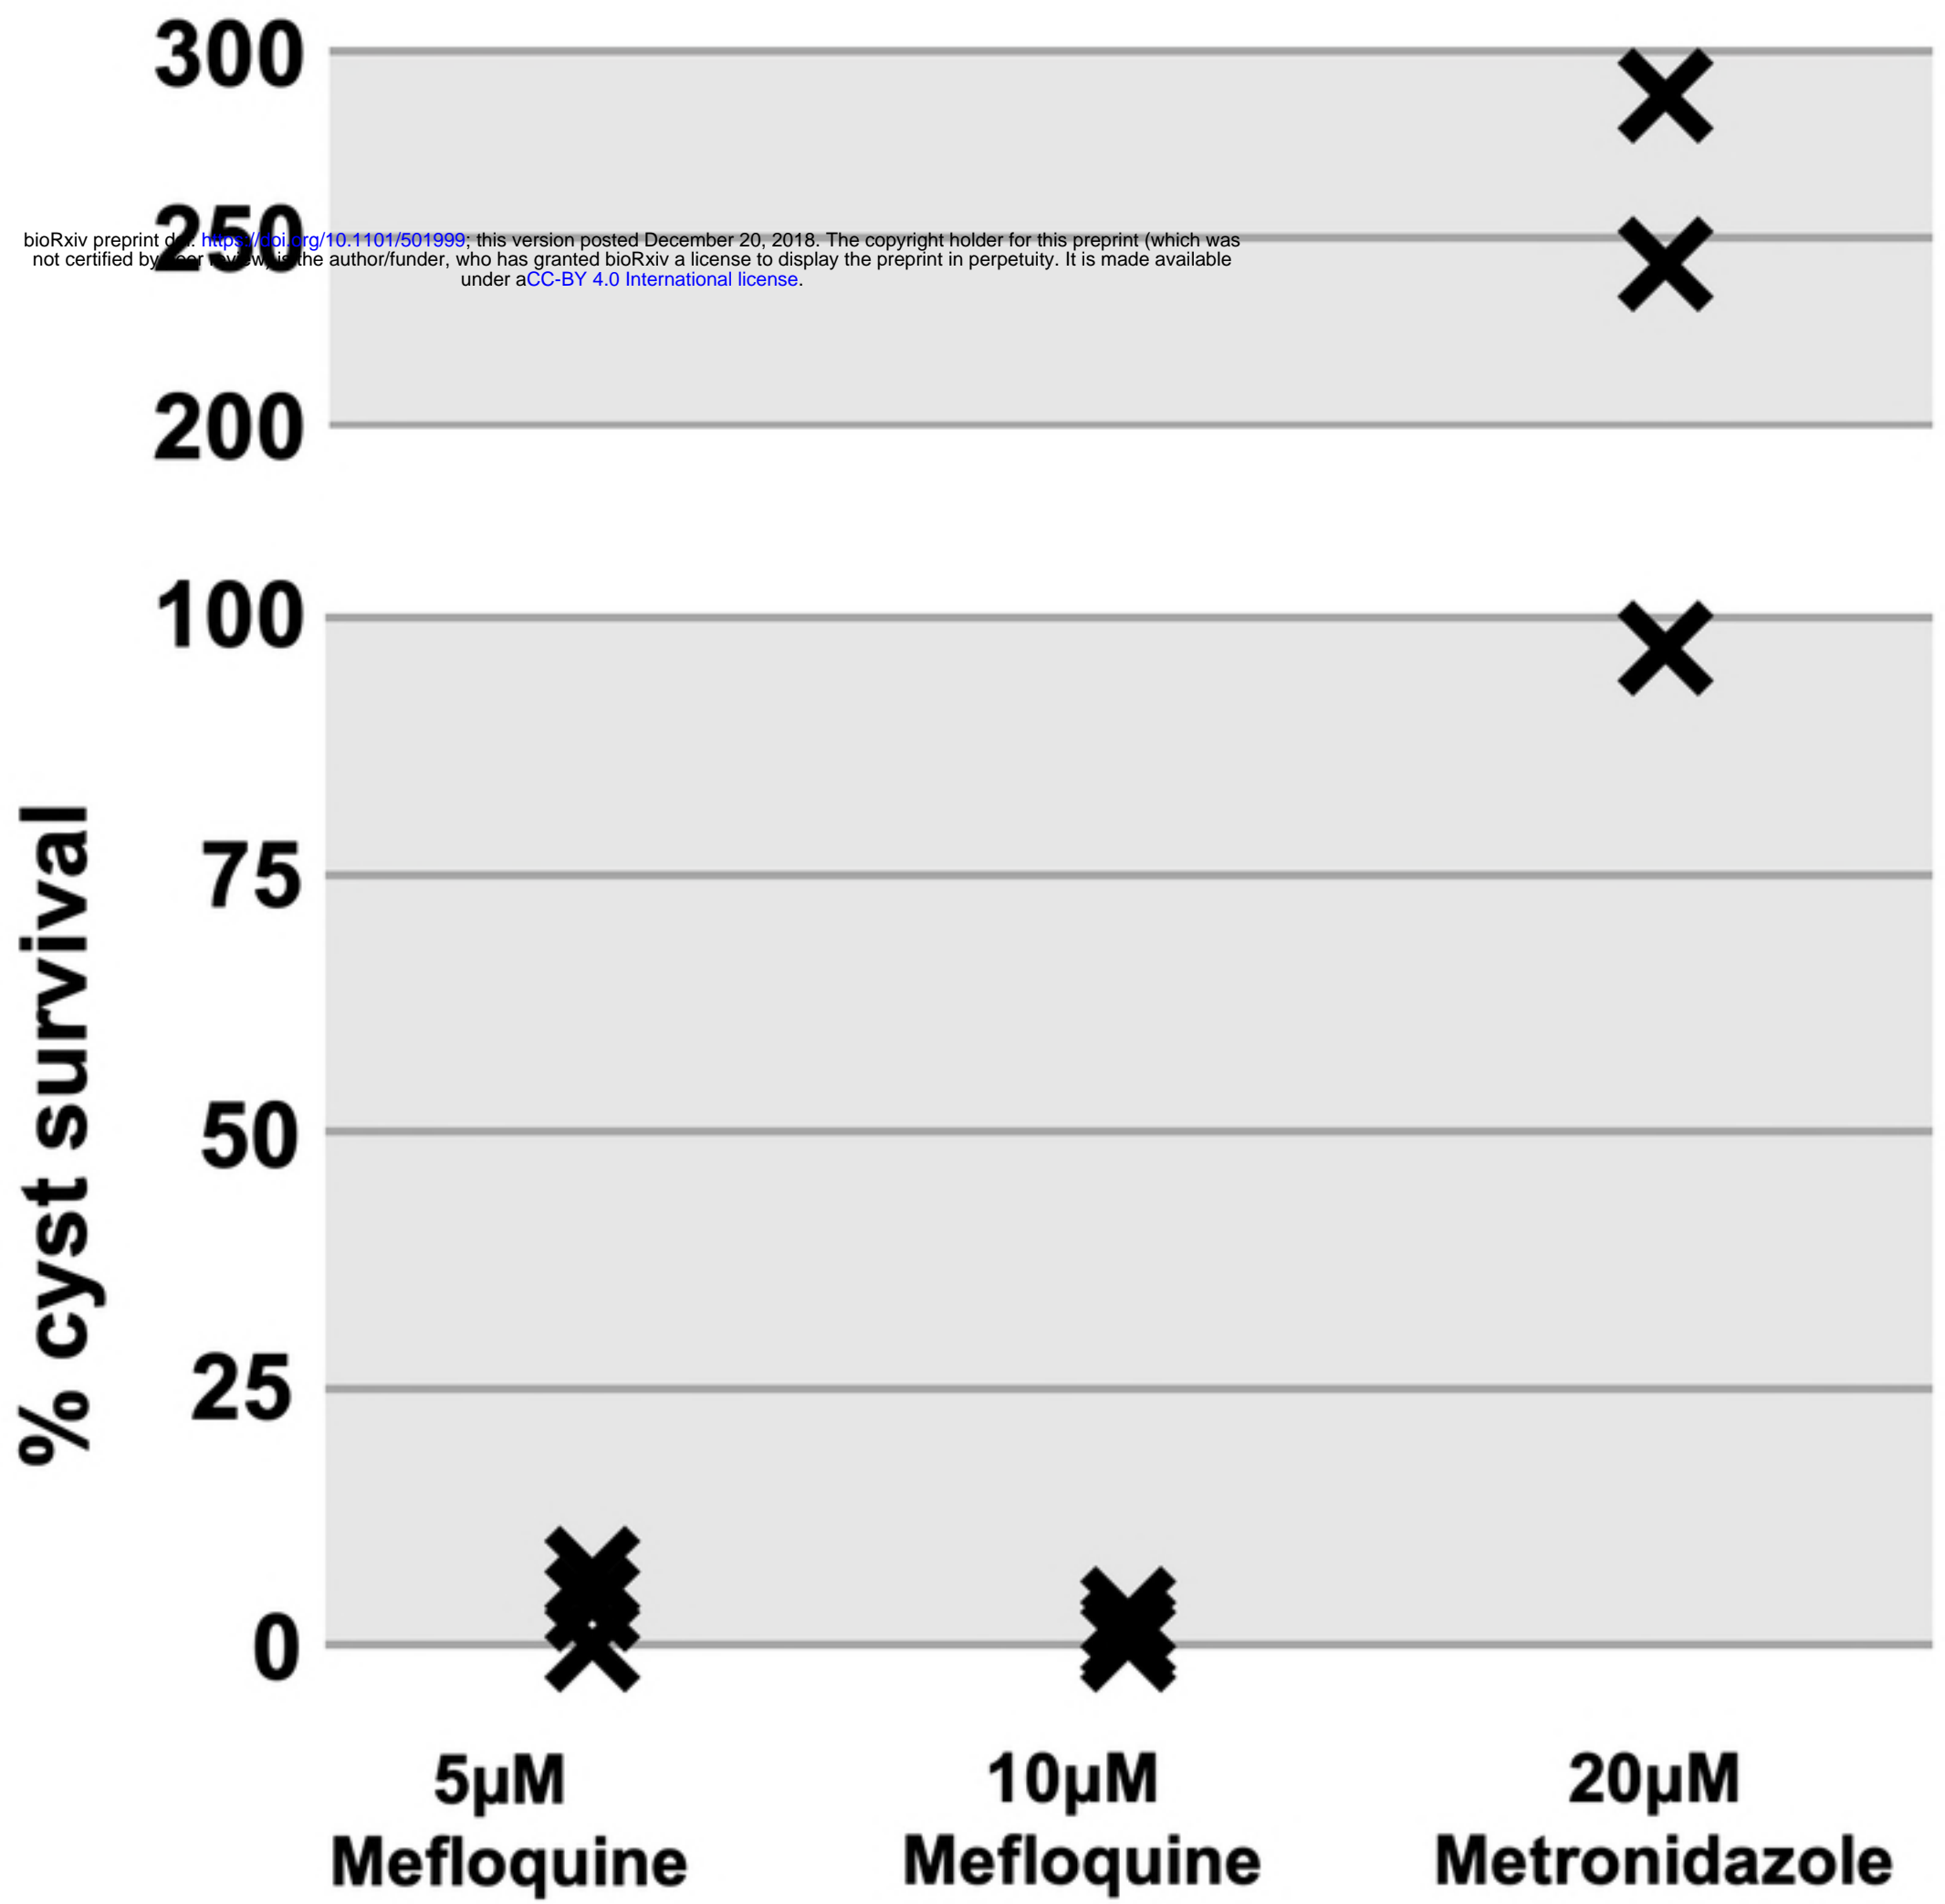

Figure 5
